1 **CineFinch: An animated female zebra finch for studying courtship interactions**

2 Nikhil Phaniraj<sup>1</sup>, Sanjana Joshi<sup>1</sup>, Pradeepkumar Trimbake<sup>1</sup>, Aditya Pujari<sup>1,3</sup>, Samyuktha Ramadurai<sup>1,3</sup>,  
3 Shikha Kalra<sup>1,3</sup>, Nikhil Ratnaparkhi<sup>2</sup> and Raghav Rajan<sup>1\*</sup>

4 1. Division of Biology, Indian Institute of Science Education and Research Pune, Pune,  
5 Maharashtra, 411008 INDIA.

6 2. Birla Institute of Technology and Science, Pilani, Rajasthan, 333031, INDIA.

7 3. These authors contributed equally

8 \* Correspondence should be addressed to Raghav Rajan. Email: [raghav@iiserpune.ac.in](mailto:raghav@iiserpune.ac.in)

9 **Running Head:** Animated female zebra finch

10 **Key words:** Bird song, courtship displays, video interactions, animations

11 **SUMMARY STATEMENT**

12 We develop and test an animation of a female zebra finch to study song and courtship interactions in  
13 the male zebra finch.

14 **ABSTRACT**

15 Dummies, videos and computer animations have been used extensively in animal behaviour to study  
16 simple social interactions. These methods allow complete control of one interacting animal, making it  
17 possible to test hypotheses about the significance and relevance of different elements of animal  
18 displays. Recent studies have demonstrated the potential of videos and interactive displays for studying  
19 more complex courtship interactions in the zebra finch, a well-studied songbird. Here, we extended  
20 these techniques by developing an animated female zebra finch and showed that ~40% of male zebra  
21 finches (n=5/12) sing to this animation. To study real-time social interactions, we developed two  
22 possible methods for closed loop control of animations; (1) an arduino based system to initiate  
23 videos/animations based on perch hops and (2) a video game engine based system to change  
24 animations. Overall, our results provide an important tool for understanding the dynamics of complex  
25 social interactions during courtship.

## 26 INTRODUCTION

27 Complex behavioural displays are used by animals to communicate with each other (Bradbury and  
28 Vehrencamp, 2011). These behavioural displays carry information necessary for successful  
29 communication and often, have multiple different components that are produced together. For example,  
30 the courtship dance of the blue-capped cordon bleu, a songbird, involves multiple rapid foot and head  
31 movements that occur just before song, a vocal signal (Ota et al., 2015). Are all of these different  
32 components (foot, head movements and vocal signal) important for successful courtship? Do individual  
33 components of the display carry information about courtship potential or is courtship potential  
34 signalled only by presence of the entire display? Answering these questions requires complete control  
35 over one of the interacting animals to ensure that different components can be produced independent of  
36 each other. Such control is provided by robotic dummies, videos and computer animations and animal  
37 behaviour studies have a rich tradition of using such stimuli (Tinbergen, 1948; Woo and Rieucan,  
38 2011). For example, Patricelli and colleagues used robotic female satin bowerbirds in artificially staged  
39 courtship interactions to demonstrate that male satin bowerbirds regulate the intensity of their courtship  
40 displays based on female responses (Patricelli et al., 2006). Van Dyk and Evans used computer  
41 animations of Jacky dragon lizards to understand the dynamics of aggressive encounters and showed  
42 that lizards use multiple signals to assess the level of aggression (Van Dyk and Evans, 2008).

43

44 Recent studies have extended the use of dummies and videos to understand more complex interactions  
45 like courtship in songbirds. In the zebra finch, a well-studied songbird native to Australia, courtship  
46 involves a song and a dance by the male (Sossinka and Böhner, 1980; Ullrich et al., 2016; Zann, 1996).  
47 Females also respond with vocalizations and tail-quivering displays (Zann, 1996). Male zebra finches  
48 sing to taxidermically stuffed female zebra finches and to videos of female zebra finches and the  
49 characteristics of these songs are highly similar to courtship song directed at a live female bird (Bischof  
50 et al., 1981; Galoch and Bischof, 2007; James et al., 2019). In addition to courtship interactions, male  
51 zebra finches also interact with juvenile zebra finches during tutoring sessions. Juveniles learn songs  
52 more accurately from a live tutor than from song playbacks from a speaker (Derégnaucourt et al.,  
53 2013). This suggests that the visual stimulus of the tutor and possibly social interactions with a tutor are  
54 also important for accurate learning. While the mere presence of a visual tutor, in the form of a video, is  
55 not sufficient to enhance learning (Varkevisser et al., 2022a), a recent study showed that a robotic zebra  
56 finch that vocally interacts with juvenile birds does enhance learning (Araguas et al., 2022).

57 Importantly, the robotic zebra finch provided closed-loop vocal interactions, i.e. vocal interactions were  
58 provided only when juveniles interacted with the robot and the timing of these vocal interactions were  
59 comparable to the timing of interactions with live tutors. The robotic zebra finch highlighted the  
60 potential of appropriately manipulatable, artificial stimuli for probing complex social interactions, but  
61 such stimuli have not been tested in the context of courtship.

62  
63 In addition to robots, animations provide an attractive method to provide closed-loop social  
64 interactions. The advent of fast computer hardware and user-friendly open-source graphics software  
65 has made it much easier to generate and control animations (Stowers et al., 2017). They provide a  
66 complementary approach to robots with considerable flexibility for studying social interactions. Here,  
67 we developed an animation of a female zebra finch and showed that ~40% of male zebra finches tested,  
68 sang to this animation. We also demonstrated two possible ways to interactively control these  
69 animations.

70

## 71 **MATERIALS AND METHODS**

72 All experimental procedures conducted were approved by IISER Pune's Institute Animal Ethical  
73 Committee (IAEC) and were in accordance with the guidelines of the Committee for the Purpose of  
74 Control and Supervision of Experiments on Animals (CPSCEA), New Delhi. Zebra finches (n=25  
75 males and n=5 females) were procured from a local vendor (n=7) or bred in our colony at IISER Pune  
76 (n=23). Birds bought from an outside vendor were used for experiments only after they had been in our  
77 colony at IISER Pune for more than 30 days. Birds were raised in individual cages (120 cm x 50 cm x  
78 50 cm cage, up to 6 birds per cage) along with other birds of the same gender. Light conditions were  
79 regulated to maintain a 14/10 hour day/night cycle. *Ad libitum* access to food and water were provided  
80 at all times, unless otherwise mentioned. All birds were >100 dph at the time of the experiment (males  
81 > 100dph and females > 300dph).

82

### 83 Experimental Apparatus

84 The apparatus consisted of a metal double-cage (46 cm x 23 cm x 23 cm) with each half separated by a  
85 glass slab (23 cm x 23 cm x 0.3 cm). One half housed the subject male bird. During live female trials,  
86 the other half housed a stimulus female bird. During video playback or animation trials, the other half  
87 had a Samsung galaxy tab S4 placed upright lengthwise with its screen touching the glass slab. To

88 record song produced by the male, we placed a microphone (AKG Acoustics C417PP omnidirectional  
89 condenser microphone) on top of the cage above the male. A camera (GoPro Hero7) was placed outside  
90 the apparatus to record videos of the sessions.

91

### 92 Experimental subjects

93 For the experiments where males were presented with videos of females (video trials), we used 10 male  
94 zebra finches for the 30s trials and 10 males for the 4-minute trials. For the animation experiments, we  
95 used 12 males. 4 males were common across the 30s and 4-minute trials, 1 male was common across  
96 both 4 minute trials and animation trials and 1 bird was common for 30s and 4-minute video trials and  
97 animation trials. For the video experiments, we used 3 female zebra finches for the 30s trials and 2  
98 female zebra finches for the 4-minute trials. For the animation experiments, we used 2 females. One  
99 female was common across 4-minute and 30s video trials and one female was common across 30s  
100 video and animation trials.

101

### 102 Stimulus videos

103 4 minute long videos (2560 x 1440 pixels @60 fps) of a female bird were recorded while the female  
104 interacted with a male bird (see Movie 1 for part of a video). The same experimental setup that was  
105 used for video trials with the male was used for this and the male was positioned just beside the video  
106 camera, on the other side of the glass slab (Fig. 1A). The aspect ratio of the video was fixed at 15.5 cm  
107 x 8.7 cm to ensure that the female bird in the video appeared life-sized.

108

### 109 Construction of Animations

110 Initially, a 13.67s long animation of a female zebra finch was made using Blender 2.90.1  
111 (<https://www.blender.org/>). This initial animation consisted of 820 frames which were played at 60fps.  
112 To make this, first, a 3D model of a female zebra finch was sculpted (Fig. 2A). Next, colours from a  
113 photograph of a female zebra finch were extracted and used to paint the skin of the 3D model (Fig. 2B).  
114 A feathery texture was added. 2 core bones (grey in Fig. 2C) and 9 structural bones (yellow in Fig. 2C)  
115 were rigged into the body and 5 control bones (blue in Fig. 2C) were placed outside that connected to a  
116 single bone or multiple distant bones for synchronized body movements and provided for puppeteer-  
117 like control of the zebra finch (Fig. 2A-2D). One of the control bones was placed in front of the beak  
118 and the beak bone programmed to always point towards the beak control bone. The beak-head joint

119 was kept rigid whereas the head bone was free to rotate around the neck bone giving the head-neck  
120 joint 3 degrees of freedom. The second control bone was placed behind the tail and the tail bone  
121 programmed to always point to the tail control bone. The tail bone could rotate around the joint in both  
122 horizontal and vertical plane but not around its long axis, giving it 2 degrees of freedom. 2 of the  
123 control bones were placed in front of the claw and the claw bones were programmed to always point to  
124 the claw control bone. 2 additional bones were placed behind the knee, outside the body, to mark  
125 endpoints for inverse kinematics of the knee (red in Fig. 2C). These two external bones prevented the  
126 knee joints from displacing beyond the marked endpoints. The ankle joint was kept rigid whereas the  
127 knee and the pelvis were allowed restricted rotation in only the vertical plane giving them 1 degree of  
128 freedom. The 5th control bone was the master control bone (deep blue in Fig. 2C) placed directly  
129 below the centre of mass of the bird and this bone connected the other 4 control bones and allowed for  
130 coordinated movements of the two legs, tail, and head.

131 The initial animation started with the female zebra finch hopping in from the left, performing 2 head  
132 turns (towards its right and its left), hopping to the centre, rotating towards the viewer, bending, and tail  
133 quivering (see Fig. 2E-2H for frames from the animation). After the tail quivering, the female was  
134 made to go back to the initial posture, hop to the right, perform 2 head turns (towards its right and its  
135 left), and hop to the right again – out of view. The velocity of hops, head turns and tail quivering were  
136 roughly similar to those of the female in one of the 30s responsive videos. We only matched the  
137 velocity qualitatively and did not reproduce exact statistics of movements. This initial animation was  
138 duplicated, laterally inverted and stitched to the end of the original animation to make the female enter  
139 from the left, exit from the right, then enter from the right, and exit from the left. This entire animation  
140 sequence, now 1640 frames (27.33s) long was again duplicated thrice and the 4 parts stitched together.  
141 A 10s clip showing an image of an empty cage was added to the beginning and the entire animation  
142 video was ~ 2mins (119.33s) long. A 5s long audio clip with 3 female calls was added to the first 5s of  
143 the animation (see Movie 2). The final animation video was played with the audio on (Call animation)  
144 or muted (No call animation). A color control animation was made where the bird in the animation was  
145 entirely painted with deep blue and the feathery texture removed (see Movie 2). Everything else was  
146 kept the same.

#### 147 General experimental procedures

148 All birds used for experiments were housed singly in small cages (23 cm x 23 cm x 23 cm) starting a  
149 few days before the start of the experiment and for the entire duration of the experiment, unless

150 otherwise mentioned. For 30s trials, pairs of male subject birds were acclimatized to the setup by  
151 housing them in the apparatus – one bird on each half of the setup for 48 hours – 2 weeks before the  
152 start of the experimental trials, and again for 48 hours, before the time of the experimental trial. All  
153 experimental trials were conducted in sound-attenuation enclosures (Newtech Engineering Systems,  
154 Bengaluru or custom-made enclosures). For all experiments, songs were recorded with a microphone  
155 placed at the top of the cage. Signals from the microphone were amplified using a mixer (Behringer  
156 XENYX 802) and then digitized on a computer system at a sampling rate of 44,100 Hz using a custom-  
157 written Python based software. Undirected songs were recorded over a period of 24 hours, with birds  
158 housed singly in a cage (23 cm x 23 cm x 23 cm) in the same sound isolation box. 1 of the 7 birds  
159 never sang undirected songs.

160

#### 161 Video presentation procedures

162 Across all trial types, videos were played manually by the experimenter, without the audio, as a  
163 window on the screen. The video window overlapped an image of an empty cage in the background.  
164 The tablet was placed in its position as soon as the video was started. Once the video ended, the video  
165 window disappeared showing only the image of the empty cage on the screen. Animations were also  
166 converted into videos as described above and played using the same procedure.

167

#### 168 Short duration experimental trials (30s Video trials)

169 For the 30s video trials, experimental trials were conducted over a period of 10 days with one bird  
170 going through the experiment each day. Two, 30s long, silent, videos of each female were chosen as  
171 stimuli; (1) a “responsive” video where the female showed tail quivering and (2) an “unresponsive”  
172 video where the female did not show tail quivering. These videos were cut out of the 4 minute long  
173 videos of female birds that were recorded as described above. Along with the “responsive” and  
174 “unresponsive” videos, we also presented a live female as a third stimulus. Each of the three stimuli  
175 was repeated thrice and the 9 stimuli were presented to the male in random order separated by 5  
176 minutes (Fig. 1B).

177

#### 178 Long duration experimental trials (4-minute video trials)

179 For the 4-minute video trials, we used the 4 minute long videos recorded as described above.  
180 Experimental trials were conducted over multiple days. On a given day, male birds were briefly



181 checked with ~10s exposure to the tablet to see if they sang to the video. Birds went through the trial  
182 only if they sang to the video during the brief exposure (n=3/10 birds did not sing to the video on their  
183 first exposure and were not used further). During the actual trial, the subject bird was exposed to either  
184 the live female or the video for 4 minutes. For the live female condition, one of the two females was  
185 randomly chosen as the stimulus. For the video playback condition, one of the two videos (one of each  
186 female stimulus) was chosen to be played. For each male, only one type of trial was conducted on a  
187 given day. This procedure was repeated for each male on separate days until we obtained at least 6 song  
188 bouts for each trial type (median of 7 days per male; range: 6-18).

189

### 190 Animation trials

191 For the animation trials, birds were tested with a single exposure to the 2 minute animation of the  
192 female zebra finch without audio. Only 5/12 birds tested sang to this animation and these 5 birds were  
193 chosen for further experiments. Experimental trials consisted of 3 days of experiments with each day  
194 consisting of 5 types of trials (live female, video of female, animation with call, animation without call  
195 and colour control animation) in a random sequence. Each trial lasted 2 minutes and trials were  
196 separated by 5 minutes.

197

### 198 Song Analysis

199 Songs were analysed as described earlier (Kalra et al., 2021; Rajan and Doupe, 2013; Rao et al., 2019),  
200 using custom-written scripts on MATLAB (MathWorks). Briefly, songs were first segmented into  
201 syllables based on an amplitude threshold. Syllables with inter-syllable intervals < 5 ms were merged  
202 into one syllable and syllables shorter than 10s were discarded. Then, syllables were manually labelled  
203 based on their appearance on a spectrogram; similar looking syllables were given the same label. The  
204 sequence of syllables that repeated in a bird's song was identified as a motif (Sossinka and Böhner,  
205 1980; Zann, 1996). Short syllables that were repeated a variable number of times at the beginning of a  
206 bout were considered as introductory notes (Kalra et al., 2021; Rajan, 2018; Rajan and Doupe, 2013;  
207 Rao et al., 2019). The number of introductory notes at the beginning of a bout was quantified by  
208 starting with the introductory note immediately preceding the first syllable of the bout and counting  
209 backwards until either (1) the previous note was not an introductory note or (2) there was a silence >  
210 500 ms (Kalra et al., 2021; Kao et al., 2005; Rajan and Doupe, 2013; Rao et al., 2019; Sossinka and  
211 Böhner, 1980). Song bouts were defined as groups of vocalizations that contained at least one motif

212 syllable and were separated from other such groups by more than 2 s of silence. All song bouts sung by  
213 birds towards live females and video/animation were considered for analysis as independent song bouts  
214 and were combined with all other song bouts across sessions/days. Of all the undirected bouts sung by  
215 a bird, 15 were randomly chosen for analysis for the 4 minute trials (median: 15; range: 14-16) and 4  
216 were chosen randomly for analysis for the 30s trials (median: 4; range: 2-6). The number of undirected  
217 bouts to analyse was chosen to be comparable to the number of song bouts produced by the male in  
218 response to the live female and video trials.

219

### 220 *Tutoring of birds with videos*

221 Juveniles used for tutoring were isolated as described earlier (Kalra et al., 2021). Briefly, fathers were  
222 removed from the nest around 12 days post hatching (range: 9-13) and juveniles were housed along  
223 with their mother until they could feed on their own (range: ~35-40 days post hatch). Following this,  
224 individual juveniles were housed singly and tutoring began on ~37dph (range: ~ 36-46 dph). Tutoring  
225 was done in a cage that contained two perches; one was active and associated with playback of the tutor  
226 song as described below and one perch was a dummy. The active perch had an IR beam running across  
227 it, which was monitored by an Arduino board (<https://www.arduino.cc/>). When the bird jumped onto  
228 the perch a break in the IR beam was detected by the Arduino-MATLAB interface. This triggered the  
229 tablet screen to play the video of the male bird along with audio playback of the tutor song.  
230 Specifically, an IR-beam break initiated a command to virtually “tap” on a specific coordinate on the  
231 tablet screen. This “tap” opened the video in a VLC window of whose size was chosen to ensure that  
232 the bird in the video was of a realistic size. The latency of the perch-hop to display loop was generally  
233 <1 sec but we noticed that it was longer for the first few hops in a session. After the video ended, the  
234 display was reset to an image of the far end of the cage as it would have appeared if the tablet were not  
235 present. This was also used as the initial image before tutoring began. Tutoring was done for 1-2  
236 sessions per day (median number of tutoring sessions across birds = 45; range = 24-51; some days, we  
237 did not conduct tutoring). In each session, we limited the number of possible song playbacks to 20 as  
238 too much exposure to song has been shown to result in poor imitation (Tchernichovski et al., 1999).  
239 Each session lasted until the bird had exhausted the quota of 20 playbacks. If the bird did not trigger 20  
240 playbacks, then the session was terminated after 1 hour. Passive playbacks were used occasionally to  
241 prompt the bird to hop on the perch. Playback songs consisted of introductory notes (INs) followed by  
242 2 motifs (n=3 were tutored with 2 INs and n=3 were tutored with 7 INs). At ~70 dph (range: 63-79

243 dph), we switched the number of INs for the tutor song and tutoring with the changed song continued  
244 till 90 dph. These were done to determine if the number of INs can be changed during the course of  
245 learning and are part of another ongoing study. However, for the purpose of this study, we only  
246 considered the accuracy of imitation of the motif and this motif was not changed during the entire  
247 duration of tutoring.

248  
249 Song similarity was calculated using 5 example motifs recorded from these birds at ~90 dph (range: 90-  
250 100 dph). Similarity calculations were done using Sound Analysis Pro (SAP) (Tchernichovski et al.,  
251 2000) as described earlier (Kalra et al., 2021). Briefly, asymmetric time-course similarity  
252 measurements were made between tutor song and 5 example motifs and the average of these similarity  
253 values was taken as a measure of similarity to the tutor song. For comparison with birds tutored without  
254 videos, we used birds tutored at IISER Pune for a different study (n=10) (Kalra et al., 2021). These  
255 birds were tutored with 2 motifs without INs using active playback methods.

256

#### 257 Closed-loop animations

258 The animated female zebra finch described earlier was used in conjunction with a video game engine to  
259 create interactive animations. First, animations were added to the female model using keyframing, a  
260 technique used in blender. Animations included movements like hops, neck movements, body rotation,  
261 tail quivering, and panting. The animation also included female calls (3 calls per stimulus). The  
262 animated female was then exported in FBX (filmbox) format. FBX format was chosen for  
263 compatibility with the game development software, Unreal Game engine 4  
264 (<https://www.unrealengine.com/en-US>). This model was imported into Unreal engine 4 (version  
265 4.27.2). Unreal engine 4 was used to create a simple game for generating potential stimuli. First, we  
266 created a 1D blend space, i.e. an axis that allowed us to gradually blend a stationary animated female  
267 zebra finch into a hopping, tail-quivering zebra finch. Then, key-presses were associated with different  
268 positions along this axis, thereby allowing us to control the speed of hopping and tail-quivering. The  
269 key-press associations were made within the code of the game engine (Fig. S3) and such stimuli  
270 generated from the game would allow interactive-control of the animation in real-time.

271

#### 272 Statistical analysis

273 We did not perform any apriori sample size calculations. All statistical analyses was done with R.  
274 Sample sizes used were comparable to other studies (Ikebuchi and Okanoya, 1999; James et al., 2019;  
275 Takahasi et al., 2005) Generalized Linear Mixed Models (GLMMs) were used to statistically analyse  
276 the data. We considered each song bout as a single unit and considered all song bouts across trial types  
277 for statistical analyses. Response variables were fit using the appropriate distributions; bouts per  
278 presentation and number of INs were count variables and were fit using a Poisson distribution, bout  
279 durations were skewed towards lower duration values, so we log transformed these values and a log-  
280 linked Gaussian distribution was used. Bird identity was a random effect and stimulus type was a fixed  
281 effect for all analyses. Day Number, Presentation number and bout number (all ordinals) were included  
282 as fixed terms while analyzing the number of INs and bout durations in the animation trials. Only day  
283 number and presentation number were included as fixed terms (along with stimulus type) for analyzing  
284 the number of bouts per stimulus for animation trials. Only presentation number and stimulus type were  
285 fixed terms for analyzing the number of bouts per stimulus for the 30 s video trials. For the rest,  
286 stimulus type was the only fixed term (day, presentation, and bout numbers could not be included when  
287 comparisons with undirected songs were made). Type II Wald Chi Sq. tests were used to determine  
288 statistical significance followed by pairwise comparisons between stimulus type using estimated  
289 marginal means with Holm correction. To compare the log ratio of time spent singing across different  
290 conditions, and to analyze the number of bouts per stimulus in the 4-minute video trials, we used a  
291 Kruskal-Wallis test. An alpha level of 0.05 was considered for all statistical analyses.

292

## 293 **RESULTS**

### 294 *Male zebra finches sang short song bouts to 30s videos of female zebra finches*

295 Our goal was to make an animated female zebra finch that could be used for understanding social  
296 interactions. We first tested our display systems by examining responses of male zebra finches to  
297 videos of female zebra finches. We used two different videos (see Fig. 1A and Methods for video  
298 recording procedures) of the same female: (1) a “responsive” video where the female made tail-  
299 quivering movements and (2) an “unresponsive” video without tail-quivering movements (Movie 1).  
300 Individual males were presented with 3 presentations each of the two types of videos and 3  
301 presentations of a live female in random order (Fig. 1B; see Methods for details). Male birds sang  
302 comparable number of songs to videos of female birds and to live females (Fig. 1C, 1D, Movie 1, Fig.  
303 S1A, Fig. S2A). As reported earlier (James et al., 2019), song bouts directed to either of the videos

304 were considerably shorter than song bouts directed to a live female (Fig. 1E). Songs directed towards  
305 live females and songs directed towards videos of females were preceded by greater number of  
306 introductory notes as compared to “undirected” songs produced when the bird was alone (Fig. 1F),  
307 indicating the “directed” nature of songs sung to the videos (Sossinka and Böhner, 1980). Overall,  
308 these results showed that males sing “directed” songs to videos of females and singing behaviour was  
309 not influenced by responsiveness of the female.

310

### 311 Longer duration videos elicited longer song bouts

312 To test whether longer stimulus durations elicit longer song bouts, we next presented males with 4  
313 minute videos consisting of both “responsive” and “unresponsive” segments. Each day, individual  
314 males were presented with either a video or a live female each day (Fig. 1G) and trials were conducted  
315 for multiple days in a random order until we obtained atleast 6 song bouts in both conditions (see  
316 Methods for details). Birds sang comparable number of song bouts to the live female and to the videos  
317 (Fig. 1H, 1I, S1C). Song bouts to the live female were still longer (Fig. 1J), but the difference in length  
318 of song bouts to videos and live females was smaller with longer video durations (Fig. S1C, S2C). This  
319 was largely a result of more singing after the first 30s (Fig. S1C). Songs directed to the 4 minute videos  
320 were also preceded by higher number of introductory notes compared to undirected songs (Fig. 1K).  
321 Overall, these results suggest that video duration plays a role in determining song bout duration  
322 possibly by giving the bird more time to detect and respond to the presence of a female on the screen.

323

### 324 Building an animation of a female zebra finch

325 To obtain greater control of the behaviour, we next constructed an animation of a female zebra finch.  
326 The animation was constructed in Blender by sculpting a 3D model of a female zebra finch, painting  
327 the skin with realistic colours and adding a feather texture (Fig. 2A, 2B). Bones were rigged into the  
328 body to allow for puppeteer-like control of movement of specific body parts (Fig. 2C; see Methods for  
329 details). Finally, the bird was placed in a background of a cage (Fig. 2D). We used this to construct a  
330 simple animation that involved the female hopping in, performing a few head turns and quivering its  
331 tail. This sequence was repeated multiple times to construct a 2 minute video that began with the image  
332 of an empty cage (Fig. 2E – 2H; first 2 minutes of Movie 2; see Methods for full details). This video  
333 was played with the 5s of female calls on appearance of the female (Call animation) or without audio  
334 (No call animation). As a control, we used a colour-modified version where the entire bird was painted

335 with deep blue and the feathery texture removed (last 2 minutes of Movie 2). Everything else including  
336 all the movements were kept the same.

337

### 338 Male zebra finches produced courtship songs directed at the animations

339 To test the ability of this animation to elicit song, we tested male birds across 3 sessions (1 session/day)  
340 using 5 stimuli presented in random order in each session. The five stimuli used were (1) a live female,  
341 (2) a video of a female, (3) video of the animated female zebra finch with and without audio (3 and 4)  
342 and the (5) colour-modified control animation without audio (Fig. 2I; see Methods for details).  
343 Stimulus duration was kept at 2 minutes. We selected birds based on response to a single 2 minute  
344 exposure to the animation without calls. 5/12 males sang to this single exposure and were chosen for  
345 the 3 sessions. Male birds sang to all stimuli with comparable numbers of song bouts (Fig. 2J, 2K, S1B,  
346 S2B). Song bouts directed at the animation (Movie 3) were comparable in duration to song bouts  
347 directed at videos (Fig. S2D), but significantly shorter than song bouts directed at live females (Fig.  
348 2L). Songs directed at animations began with a large number of introductory notes confirming the  
349 “directed” nature of these songs (Fig. 2M). Interestingly, 3/5 birds also sang to the colour-modified  
350 control animations (Fig. 2J, 2K, 2L). These bouts were also preceded by a large number of introductory  
351 notes and were comparable in length to bouts directed towards the animation (Fig. 2M). These results  
352 demonstrate the potential of using animations to elicit song and suggest that such animations could be  
353 used to further study courtship interactions in the zebra finch.

354

### 355 Methods for closed loop control of the animation

356 To use these animations to study courtship interactions, we needed methods to change these animations  
357 in real-time, i.e. we needed a closed-loop system. Here, we used two different approaches to produce  
358 interactive animations; (1) using an Arduino to control the appearance of a video and (2) using the  
359 animation in conjunction with a gaming engine.

360

361 In the first approach, we used an Arduino (a single-board microcontroller) based approach to control  
362 the appearance of a video for tutoring young birds. Since young birds learn better from a live tutor than  
363 from song playback from a speaker (Derégnaucourt et al., 2013), we used active tutoring methods to  
364 test whether including a video of a male bird along with song playback increased copying accuracy.  
365 Juveniles could hop on a perch to elicit song playback and video playback of a male bird (Fig. 3A; see

366 Methods for details of procedure). Juveniles tutored by this method (n=6) copied tutor songs with  
367 accuracies similar to juveniles tutored by song playback alone (Fig. 3B shows spectrograms of tutor  
368 song and songs of two juveniles; Fig. 3C; n=6 birds with video and n=10 birds with only audio  
369 playbacks from Kalra et al. (Kalra et al., 2021)). These results suggested that the visual presence of an  
370 adult bird, albeit on a screen, does not improve copying accuracy and is supported by similar results  
371 from a recent study (Varkevisser et al., 2022a).

372

373 While, the Arduino based approach was simple and easy to use, real-time control of the animation was  
374 not possible, as latencies from perch hop to video playback were long (mean +/- std. was 0.74s +/-  
375 0.16s). In our second approach, we used a video game engine, Unreal Engine 4 to construct interactive  
376 animations. We imported the female zebra finch from Blender into Unreal Engine 4 and created a 1D  
377 blend space, i.e. an axis that allowed us to gradually blend a stationary animated female zebra finch  
378 into a tail-quivering zebra finch (Fig. 3D, S3; see Methods for details). Different speeds of movement  
379 along the axis were connected to different durations of a “key press” on a regular keyboard. While, we  
380 connected “key-presses” to different states of the animation, it should be possible to use input from a  
381 microphone to control movement of the animation allowing for song-contingent control. Such methods  
382 have been used to make birds change the fundamental frequency of their vocalizations (Tumer and  
383 Brainard, 2007). Overall, these two methods provide the potential for generating closed-loop,  
384 interactive, animations for studying courtship dynamics.

385

## 386 **DISCUSSION**

387 Here, we demonstrated potential use of animations to study courtship interactions in a songbird, the  
388 zebra finch. Specifically, we first showed that male zebra finches sang to videos of female zebra  
389 finches and song bouts were longer in response to longer videos. Second, we built an animation of a  
390 female zebra finch and showed that 42% of males sang to the animation. Finally, we showed the  
391 potential for real-time control with tools for interactive control of the animation; a feature that is  
392 essential for analysing courtship interactions in real-time. Overall, our results highlight the power of  
393 animations for studying courtship interactions in songbirds and provide a new tool for the same.

394

395 **Duration of the video is a factor that influences the amount of song produced**

396 Artificial stimuli like animations, need to capture important details of the natural stimulus to be  
397 effective. What aspects of a video/animation stimulus are important for eliciting song from a male  
398 zebra finch? Our results show that stimulus duration is an important factor to consider. Male birds sang  
399 longer song bouts when presented with 4 minute videos as compared to 30s videos of females (Fig. 1).  
400 Both in earlier studies (James et al., 2019) and our experiments, videos were played without sounds.  
401 Live females call and so, when presented with a live female, male birds would experience both visual  
402 and auditory stimuli. Such multimodality is known to be essential for learning from a tutor (Varkevisser  
403 et al., 2022b) and multimodal signals are common in the courtship displays of other songbird species  
404 (Mitoyen et al., 2019; Ota et al., 2015). Given the absence of auditory cues in the videos, longer  
405 duration videos may give birds more time to notice the video and decide to sing. Integration of auditory  
406 cues may increase responses to videos. In line with this, a recent study also used audio and visual cues  
407 to successfully allow two birds to interact with each other virtually (Larsen et al., 2022).

408

#### 409 **Improving responses to animations**

410 Our animation successfully elicited songs from only 42% of the birds tested. What can be done to make  
411 more birds respond to animations? One possibility is to make animations more realistic by  
412 incorporating realistic movement parameters by using pose-estimation software like DeepLabCut to  
413 track, quantify movements of live females (Lauer et al., 2022; Mathis et al., 2018). Another possibility  
414 is to use colour corrections based on the bird's visual system. Such colour-corrected videos have been  
415 shown to increase the attention of juvenile birds to videos of tutors (Varkevisser et al., 2022b). In our  
416 own experiments, the response of some birds to colour control animations suggests the possibility that  
417 the colour scale was not realistic enough.

418

#### 419 **Outlook for using animations for closed-loop studies of social interactions**

420 Our animations and the use of these animations in conjunction with video game engines (like Unreal  
421 Engine) provide a novel way to study social interactions in birds. Recent studies have used a robotic  
422 zebra finch for studying social interactions between juvenile birds and a tutor (the robotic bird)  
423 (Araguas et al., 2022). While a robot provides physical interactions that animations cannot provide,  
424 animations can be built and manipulated more easily. Animations, like the one we have developed  
425 would provide a complementary approach to robotic zebra finches to study social interactions using  
426 virtual-reality setups. A recent study used a virtual reality arrangement to show that two zebra finches



427 can successfully interact with each other virtually (Larsen et al., 2022). Our animations and video game  
428 engines, combined with this setup could facilitate testing and analyses of social interactions in much  
429 greater detail.

430

### 431 **Broader applications of animated animals**

432 Here, we focused on developing and controlling an animation for studying courtship interactions in  
433 zebra finches. Similar animations with other animal species can be useful for a diverse range of socio-  
434 cognitive and behavioural experiments. For instance, such animations could be used in social learning  
435 experiments to study the process of social learning. Such experiments typically require one animal in a  
436 group to learn a novel task asocially, following which social transmission of this learning can be  
437 studied (Heyes, 1994; Rendell et al., 2010; Van Schaik and Burkart, 2011). However, such asocial  
438 learning can take time. This can be speeded up using videos to teach the first animal a novel task.  
439 Animations could also be used to study interspecies encounters and animals' responses towards  
440 heterospecifics (Gröning and Hochkirch, 2008; Peiman and Robinson, 2010; Sridhar and Guttal, 2018).  
441 In some species, response to heterospecifics is plastic and is observed to vary with heterospecific  
442 individuals (Lehtonen et al., 2010; Magellan, 2020). However whether physical features (size, body  
443 shape, etc.) or behavioural features (aggression, submission, etc.) are used by animals to identify  
444 heterospecifics remains unclear. Animations, such as ours, offer independent control over physical and  
445 behavioural features and would understand interspecies interactions. Overall, our methods will not only  
446 aid the study of animal courtship interactions but will also be extendable to other fields from animal  
447 cognition to ecology.

448

### 449 **SUPPLEMENTARY INFORMATION**

450 Supplementary information includes 3 supplemental figures and 3 movies.

451

### 452 **DATA ACCESSIBILITY**

453 All data, videos, animations and files related to animation are available on reasonable request from the  
454 corresponding author (RR – [raghav@iiserpune.ac.in](mailto:raghav@iiserpune.ac.in)).

455

456 **COMPETING INTERESTS**

457 We declare we have no competing interests.

458 **ACKNOWLEDGMENTS**

459 We would like to thank Prakash Raut for bird colony maintenance and Vrushali Rao Gumnur and Aboli  
460 Ektare for preliminary tests with different monitors and video stimuli. We would like to thank Hamish  
461 Mehaffey, Mimi Kao and Girish Deshpande for helpful comments on the manuscript and the Rajan lab  
462 for useful discussion related to the project.

463

464 **AUTHOR CONTRIBUTIONS**

465 NP and RR designed the study. NP did the experiments with videos and created the animated female  
466 zebra finch in Blender. SJ carried out the animation related experiments. NR did some initial work on  
467 interactive animations using Unity and PT used Unreal engine 4 to construct interactive animations.  
468 SK, AP and SR constructed the tutoring setup and tutored juveniles with video and audio playbacks. NP  
469 and RR wrote the manuscript in consultation with SJ, PT, SK, AP, SR and NR.

470

471 **FUNDING**

472 This work was supported by grants from the Department of Science and Technology, India  
473 (DST/CSRI/2017/163), the Department of Biotechnology (DBT), India, Ramalingaswami Fellowship  
474 (BT/HRD/35/02/2006), the Science and Engineering Research Board, India (SERB  
475 EMR/2015/000829), the DBT/Wellcome Trust India Alliance Senior Fellowship (IA/S/21/1/505621)  
476 and IISER Pune to RR. SK is a graduate student supported by funding from IISER Pune and a senior  
477 research fellowship from CSIR, India (9/936(0159)/2016 EMR-1). NP was a recipient of the INSPIRE  
478 Scholarship for Higher Education.

## 479 REFERENCES

- Araguas, A., Guellaï, B., Gauthier, P., Richer, F., Montone, G., Chopin, A. and Derégnaucourt, S.** (2022). Design of a robotic zebra finch for experimental studies on developmental song learning. *Journal of Experimental Biology* **225**, jeb242949.
- Bischof, H.-J., Böhner, J. and Sossinka, R.** (1981). Influence of external stimuli on the quality of the song of the zebra finch (*Taeniopygia guttata castanotis* Gould). *Ethology* **57**, 261–267.
- Bradbury, J. W. and Vehrencamp, S. L.** (2011). Principles of animal communication.
- Derégnaucourt, S., Poirier, C., Van der Kant, A., Van der Linden, A. and Gahr, M.** (2013). Comparisons of different methods to train a young zebra finch (*Taeniopygia guttata*) to learn a song. *Journal of Physiology-Paris* **107**, 210–218.
- Galoch, Z. and Bischof, H.-J.** (2007). Behavioural responses to video playbacks by zebra finch males. *Behavioural Processes* **74**, 21–26.
- Gröning, J. and Hochkirch, A.** (2008). Reproductive interference between animal species. *The Quarterly review of biology* **83**, 257–282.
- Heyes, C. M.** (1994). Social learning in animals: categories and mechanisms. *Biological Reviews* **69**, 207–231.
- Ikebuchi, M. and Okanoya, K.** (1999). Male zebra finches and Bengalese finches emit directed songs to the video images of conspecific females projected onto a TFT display. *Zoological Science* **16**, 63–70.
- James, L. S., Fan, R. and Sakata, J. T.** (2019). Behavioural responses to video and live presentations of females reveal a dissociation between performance and motivational aspects of birdsong. *Journal of Experimental Biology* **222**, jeb206318.
- Kalra, S., Yawatkar, V., James, L. S., Sakata, J. T. and Rajan, R.** (2021). Introductory gestures before songbird vocal displays are shaped by learning and biological predispositions. *Proc Biol Sci* **288**, 20202796.

- Kao, M. H., Doupe, A. J. and Brainard, M. S.** (2005). Contributions of an avian basal ganglia-forebrain circuit to real-time modulation of song. *Nature* **433**, 638–643.
- Larsen, L. B., Adam, I., Berman, G. J., Hallam, J. and Elemans, C. P. H.** (2022). Driving singing behaviour in songbirds using a multi-modal, multi-agent virtual environment. *Sci Rep* **12**, 13414.
- Lauer, J., Zhou, M., Ye, S., Menegas, W., Schneider, S., Nath, T., Rahman, M. M., Di Santo, V., Soberanes, D., Feng, G., et al.** (2022). Multi-animal pose estimation, identification and tracking with DeepLabCut. *Nat Methods* **19**, 496–504.
- Lehtonen, T. K., McCrary, J. K. and Meyer, A.** (2010). Territorial aggression can be sensitive to the status of heterospecific intruders. *Behavioural Processes* **84**, 598–601.
- Magellan, K.** (2020). Behavioural crypsis in a South African galaxiid fish induced by predatory and non-predatory heterospecifics. *Journal of Fish Biology* **96**, 1278–1283.
- Mathis, A., Mamidanna, P., Cury, K. M., Abe, T., Murthy, V. N., Mathis, M. W. and Bethge, M.** (2018). DeepLabCut: markerless pose estimation of user-defined body parts with deep learning. *Nat Neurosci* **21**, 1281–1289.
- Mitoyen, C., Quigley, C. and Fusani, L.** (2019). Evolution and function of multimodal courtship displays. *Ethology* **125**, 503–515.
- Ota, N., Gahr, M. and Soma, M.** (2015). Tap dancing birds: the multimodal mutual courtship display of males and females in a socially monogamous songbird. *Sci Rep* **5**, 16614.
- Patricelli, G. L., Coleman, S. W. and Borgia, G.** (2006). Male satin bowerbirds, *Ptilonorhynchus violaceus*, adjust their display intensity in response to female startling: an experiment with robotic females. *Animal Behaviour* **71**, 49–59.
- Peiman, K. and Robinson, B.** (2010). Ecology and evolution of resource-related heterospecific aggression. *The Quarterly Review of Biology* **85**, 133–158.

- Rajan, R.** (2018). Pre-bout neural activity changes in premotor nucleus HVC correlate with successful initiation of learned song sequence. *Journal of Neuroscience* **38**, 5925–5938.
- Rajan, R. and Doupe, A. J.** (2013). Behavioral and neural signatures of readiness to initiate a learned motor sequence. *Curr. Biol.* **23**, 87–93.
- Rao, D., Kojima, S. and Rajan, R.** (2019). Sensory feedback independent pre-song vocalizations correlate with time to song initiation. *J. Exp. Biol.* **222**,.
- Rendell, L., Boyd, R., Cownden, D., Enquist, M., Eriksson, K., Feldman, M. W., Fogarty, L., Ghirlanda, S., Lillicrap, T. and Laland, K. N.** (2010). Why copy others? Insights from the social learning strategies tournament. *Science* **328**, 208–213.
- Sossinka, R. and Böhner, J.** (1980). Song Types in the Zebra Finch *Poephila guttata castanotis*1. *Zeitschrift für Tierpsychologie* **53**, 123–132.
- Sridhar, H. and Guttal, V.** (2018). Friendship across species borders: factors that facilitate and constrain heterospecific sociality. *Philosophical Transactions of the Royal Society B: Biological Sciences* **373**, 20170014.
- Stowers, J. R., Hofbauer, M., Bastien, R., Griessner, J., Higgins, P., Farooqui, S., Fischer, R. M., Nowikovskiy, K., Haubensak, W. and Couzin, I. D.** (2017). Virtual reality for freely moving animals. *Nature methods* **14**, 995–1002.
- Takahasi, M., Ikebuchi, M. and Okanoya, K.** (2005). Spatiotemporal properties of visual stimuli for song induction in Bengalese finches. *Neuroreport* **16**, 1339–1343.
- Tchernichovski, O., Lints, T., Mitra, P. P. and Nottebohm, F.** (1999). Vocal imitation in zebra finches is inversely related to model abundance. *Proceedings of the National Academy of Sciences* **96**, 12901–12904.
- Tchernichovski, Nottebohm, Ho, Pesaran and Mitra** (2000). A procedure for an automated measurement of song similarity. *Anim Behav* **59**, 1167–1176.

- Tinbergen, N.** (1948). Social releasers and the experimental method required for their study. *The Wilson Bulletin* 6–51.
- Tumer, E. C. and Brainard, M. S.** (2007). Performance variability enables adaptive plasticity of “crystallized” adult birdsong. *Nature* **450**, 1240–1244.
- Ullrich, R., Norton, P. and Scharff, C.** (2016). Waltzing Taeniopygia: integration of courtship song and dance in the domesticated Australian zebra finch. *Animal Behaviour* **112**, 285–300.
- Van Dyk, D. A. and Evans, C. S.** (2008). Opponent assessment in lizards: examining the effect of aggressive and submissive signals. *Behavioral Ecology* **19**, 895–901.
- Van Schaik, C. P. and Burkart, J. M.** (2011). Social learning and evolution: the cultural intelligence hypothesis. *Philosophical Transactions of the Royal Society B: Biological Sciences* **366**, 1008–1016.
- Varkevisser, J. M., Simon, R., Mendoza, E., How, M., van Hijlkema, I., Jin, R., Liang, Q., Scharff, C., Halfwerk, W. H. and Riebel, K.** (2022a). Adding colour-realistic video images to audio playbacks increases stimulus engagement but does not enhance vocal learning in zebra finches. *Animal Cognition* **25**, 249–274.
- Varkevisser, J. M., Mendoza, E., Simon, R., Manet, M., Halfwerk, W., Scharff, C. and Riebel, K.** (2022b). Multimodality during live tutoring is relevant for vocal learning in zebra finches. *Animal Behaviour* **187**, 263–280.
- Woo, K. L. and Rieucan, G.** (2011). From dummies to animations: a review of computer-animated stimuli used in animal behavior studies. *Behav Ecol Sociobiol* **65**, 1671–1685.
- Zann, R. A.** (1996). *Zebra Finch*. Oxford.

480 **FIGURE LEGENDS**

481 **FIGURE 1 Male zebra finches sing longer song bouts to 4 minute videos as compared to 30s**  
482 **videos**

483 A) Schematic depicting the way in which videos of females were recorded. The male is on the left side  
484 and the female is on the right side, separated by a glass partition. A camera was placed near the male to  
485 record videos of the female.

486 (B) Order of 30s trials in a session for one representative bird. LF represents “live female”, RV  
487 represents “responsive” video and UV represents “unresponsive” video. Inter-trial-time of 5 minutes  
488 was used.

489 (C) Example spectrograms showing songs produced by one male for the 3 different kinds of stimuli and  
490 undirected singing (UD) when the bird was alone.

491 (D), (E), (F) mean number of song bouts per session (D), mean song bout duration (E) and mean  
492 number of introductory notes (INs) (F) for all birds for the different trial types. Grey circles represent  
493 data for individual birds and grey lines connect data from the same bird. Black circles and whiskers  
494 represent mean and s.e.m across all birds (n=9 birds).

495 (G) Schematic depicting the experimental protocol for long duration experimental trials (4 minute  
496 trials). LF represents live female and VP represents video presentation.

497 (H) Example spectrograms showing the songs produced by one male for the 2 different kinds of stimuli  
498 and undirected singing (UD) when the bird was alone.

499 (I), (J), (K) mean number of song bouts per session (I), mean song bout duration (J) and mean number  
500 of introductory notes (INs) (K) for all birds for the different trial types. Grey circles represent data for  
501 single birds and grey lines connect data from the same bird. Black circles and whiskers represent mean  
502 and s.e.m across all birds (n=7 birds).

503 \* represents  $p < 0.05$ , \*\* -  $p < 0.01$ , \*\*\* -  $p < 0.001$  - Type II Wald Chi Square test followed by  
504 pairwise comparisons using estimated marginal means with Holm correction.

505

506 **FIGURE 2 Construction and validation of an animated female zebra finch**

507 (A), (B), (C), (D) Different stages in the construction of an animated female zebra finch in Blender; 3D  
508 model (A), with colour and feather texture (B). Positions of control bones with yellow representing  
509 structural bones, grey representing core bones, blue representing control bones, deep blue representing

510 the master control bone and red representing the knee stop bones (C) (see Methods for details) and final  
511 image with empty cage (D).  
512 (E), (F), (G), (H) represent different animation frames with the female hopping into view, looking to  
513 either side and quivering its tail.  
514 I) Order of 2 minute experimental trials across 3 sessions for one representative bird. LF represents live  
515 female, CA represents call with animation, NCA represents no call animation, VP represents video  
516 presentation and CC represents colour control animation. Inter-trial-time of 5 minutes was used.  
517 (J) Example spectrograms showing the songs produced by one male for the 5 different kinds of stimuli.  
518 (K), (L), (M) mean number of song bouts per session (K), mean song bout duration (L) and mean  
519 number of introductory notes (INs) (M) are shown for all birds for the different trial types. Grey circles  
520 represent data for individual birds and grey lines connect data from the same bird. Black circles and  
521 whiskers represent mean and s.e.m across all birds (n=5 birds).  
522 \* represents  $p < 0.05$ , \*\* -  $p < 0.01$ , \*\*\* -  $p < 0.001$  - Type II Wald Chi Square test followed by  
523 pairwise comparisons using estimated marginal means with Holm correction.  
524

### 525 **FIGURE 3 Potential methods for interactive control of the animation**

526 (A) Schematic of experimental setup and Arduino based approach to control song audio and video  
527 playback based on perch hopping behaviour of a juvenile zebra finch. Briefly, hopping on a perch  
528 triggers playback of song audio and video through an Arduino-MATLAB connection.  
529 (B) Example spectrograms of tutor song and the songs of two juveniles tutored using this paradigm.  
530 (C) Boxplots showing the similarity to tutor song for juveniles tutored using only audio playbacks  
531 (subset of birds from an earlier study (Kalra et al., 2021)) and audio-visual playbacks. Circles represent  
532 data from individual birds.  
533 (D) A view of the 1D blendspace in Unreal Engine 4 with the axis extremes representing “An idle  
534 animation” and “Tail quivering animation”. Different positions along the axis represent different speeds  
535 of the tail quivering.  
536



537 **SUPPLEMENTARY INFORMATION**

538 Supplementary information consists of 3 supplementary figures and 3 movies.

539

540 **SUPPLEMENTARY FIGURE LEGENDS**

541 **FIGURE S1 Raster plots showing song bouts produced by all birds during short-duration, long-**  
542 **duration and animation experimental trials**

543 (A), (B), (C) Raster plots showing song bouts produced by all birds during short-duration (A),  
544 animation (B) and long-duration experimental trials (C). Each bar represents a song bout and the length  
545 of the bar represents the duration of the song bout. Different colours represent different birds. Bird  
546 indices are indices given to unique birds. Birds that were common across different experimental trials  
547 can be tracked using this bird index (for eg. bird #7 was used for all types of experimental trials).

548

549 **FIGURE S2 Probability and amount of song produced towards different stimulus types**

550 (A), (B) Probability of singing atleast 1 bout of song for 30s video trials (A) and animation trials (B).

551 (C) Log ratio of time spent singing to video presentations relative to live females.

552 (D) Log ratio of time spent singing to animation relative to video presentation.

553 Grey circles represent data from individual birds and grey lines connect data from the same bird. Black  
554 circles and whiskers represent mean and s.e.m across all birds.

555

556 **FIGURE S3 Construction of interactive animations using video game engine Unreal Engine 4**

557 Flowchart depicting the process used to create interactive animations using the video game engine

558 Unreal Engine 4.

559

560 **MOVIE CAPTIONS**

561 **MOVIE 1 Examples of responsive and unresponsive videos and song bouts of a male zebra finch**

562 Movie shows an example of a responsive video of a female (30s), an unresponsive video of a female  
563 (30s) followed by examples of a male singing to a live female and to a responsive video.

564

565 **MOVIE 2 Male zebra finches sing to animations of female zebra finches**

566 Movie shows one cycle of the animation and one cycle of the colour control animation. This is  
567 followed by examples of males singing to the animation and the colour control animation.

568 **MOVIE 3 1D blend space in Unreal Engine 4**

569 Movie shows a 1D blend space in Unreal Engine 4 with one end of the axis corresponding to an idle  
570 female zebra finch and the other end corresponding to a tail quivering zebra finch. Speed of tail  
571 quivering varies along the axis and an intermediate speed is also shown in the video.

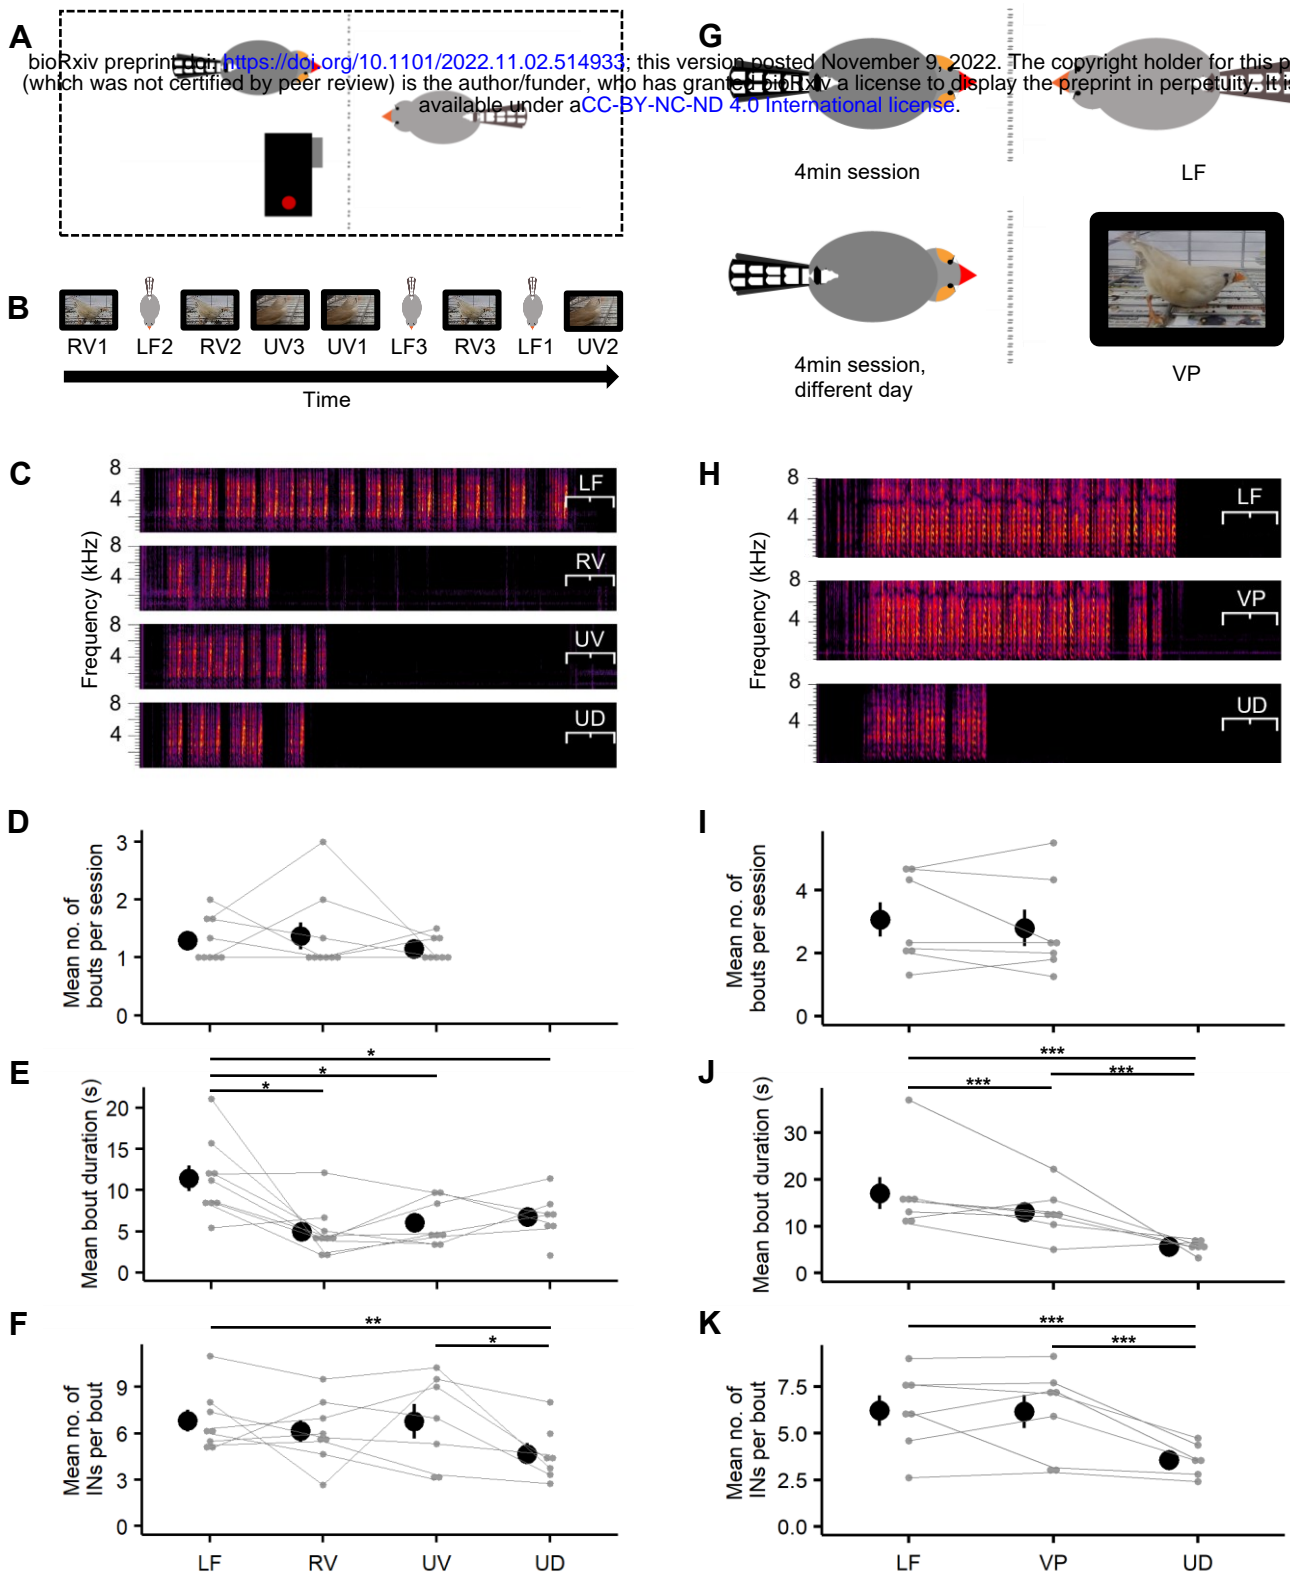

**Figure 1 Male zebra finches sing longer song bouts to 4 minute videos as compared to 30s videos**

**Figure 1 Male zebra finches sing longer song bouts to 4 minute videos as compared to 30s videos**

A) Schematic depicting the way in which videos of females were recorded. The male is on the left side and the female is on the right side, separated by a glass partition. A camera was placed near the male to record videos of the female.

(B) Order of 30s trials in a session for one representative bird. LF represents “live female”, RV represents “responsive” video and UV represents “unresponsive” video. Inter-trial-time of 5 minutes was used.

(C) Example spectrograms showing songs produced by one male for the 3 different kinds of stimuli and undirected singing (UD) when the bird was alone.

(D), (E), (F) mean number of song bouts per session (D), mean song bout duration (E) and mean number of introductory notes (INs) (F) for all birds for the different trial types. Grey circles represent data for individual birds and grey lines connect data from the same bird. Black circles and whiskers represent mean and s.e.m across all birds (n=9 birds).

(G) Schematic depicting the experimental protocol for long duration experimental trials (4 minute trials). LF represents live female and VP represents video presentation.

(H) Example spectrograms showing the songs produced by one male for the 2 different kinds of stimuli and undirected singing (UD) when the bird was alone.

(I), (J), (K) mean number of song bouts per session (I), mean song bout duration (J) and mean number of introductory notes (INs) (K) for all birds for the different trial types. Grey circles represent data for single birds and grey lines connect data from the same bird. Black circles and whiskers represent mean and s.e.m across all birds (n=7 birds).

\* represents  $p < 0.05$ , \*\* -  $p < 0.01$ , \*\*\* -  $p < 0.001$  - Type II Wald Chi Square test followed by pairwise comparisons using estimated marginal means with Holm correction.

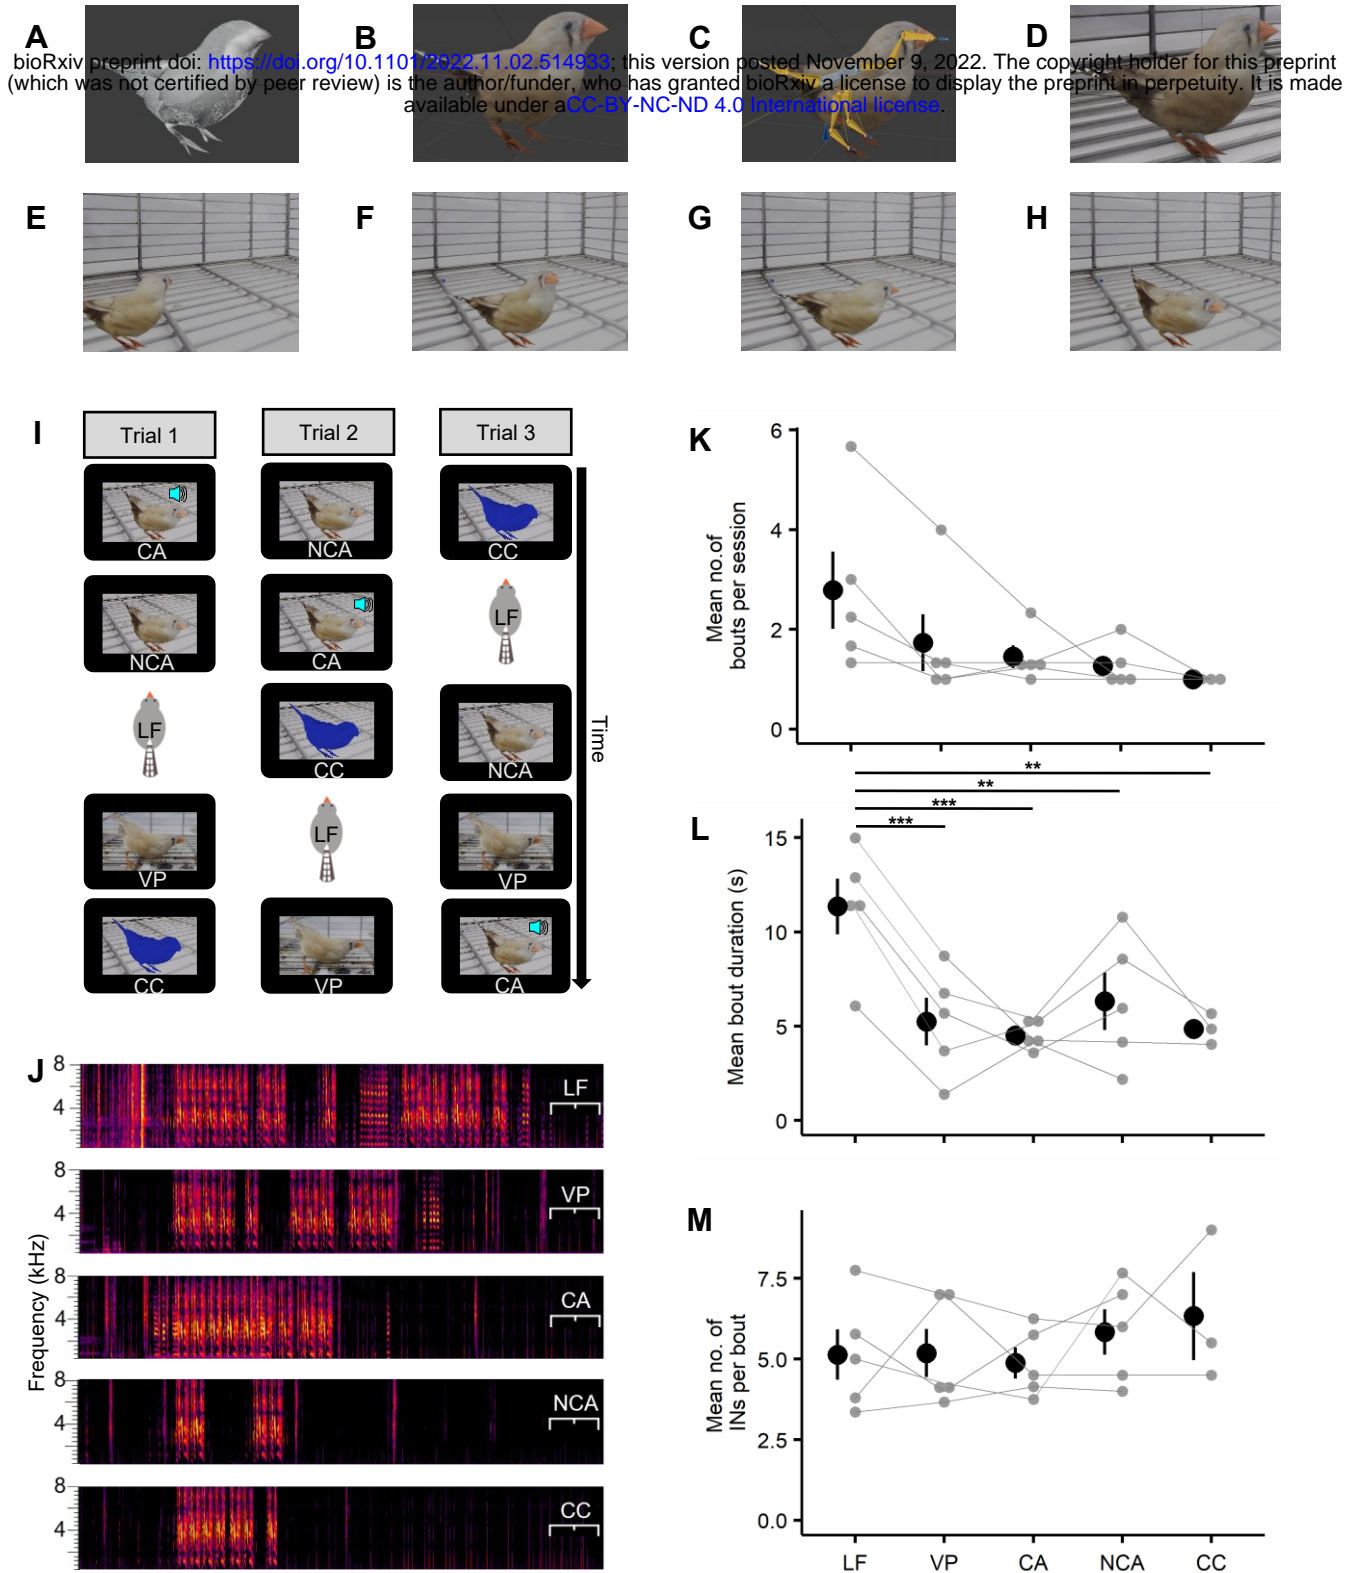

**Figure 2 Construction and validation of an animated female zebra finch**

## **Figure 2 Construction and validation of an animated female zebra finch**

(A), (B), (C), (D) Different stages in the construction of an animated female zebra finch in Blender; 3D model (A), with colour and feather texture (B). Positions of control bones with yellow representing structural bones, grey representing core bones and blue representing control bones (C) (see Methods for details) and final image with empty cage (D).

(E), (F), (G), (H) represent different animation frames with the female hopping into view, looking to either side and quivering its tail.

I) Order of 2 minute experimental trials across 3 sessions for one representative bird. LF represents live female, CA represents call with animation, NCA represents no call animation, VP represents video presentation and CC represents colour control animation. Inter-trial-time of 5 minutes was used.

(J) Example spectrograms showing the songs produced by one male for the 5 different kinds of stimuli.

(K), (L), (M) mean number of song bouts per session (K), mean song bout duration (L) and mean number of introductory notes (INs) (M) are shown for all birds for the different trial types. Grey circles represent data for individual birds and grey lines connect data from the same bird. Black circles and whiskers represent mean and s.e.m across all birds (n=5 birds).

\* represents  $p < 0.05$ , \*\* -  $p < 0.01$ , \*\*\* -  $p < 0.001$  - Type II Wald Chi Square test followed by pairwise comparisons using estimated marginal means with Holm correction.

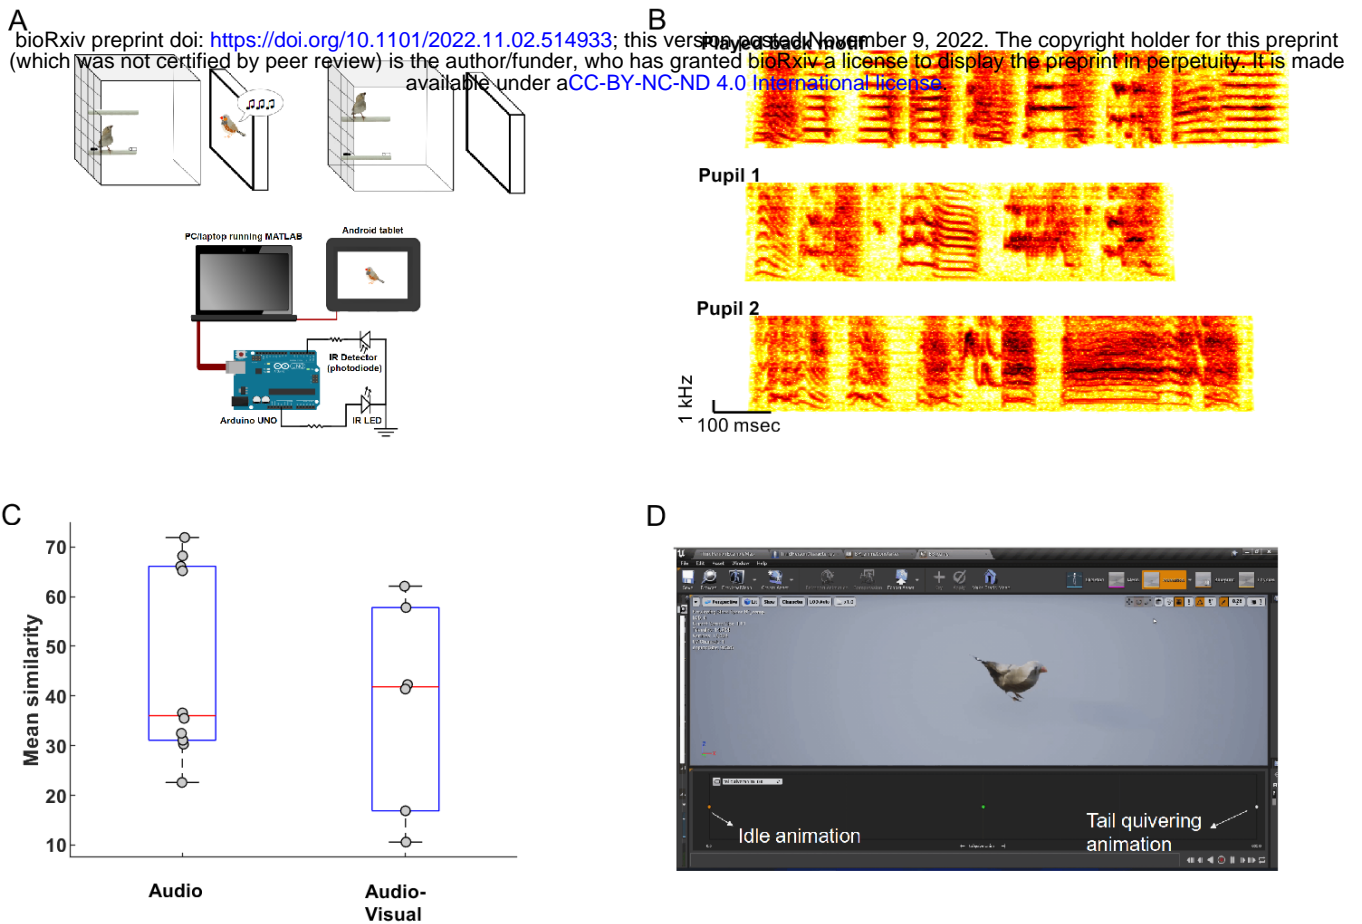

### **Figure 3 Potential methods for interactive control of the animation**

(A) Schematic of experimental setup and Arduino based approach to control song audio and video playback based on perch hopping behaviour of a juvenile zebra finch. Briefly, hopping on a perch triggers playback of song audio and video through an Arduino-MATLAB connection.

(B) Example spectrograms of tutor song and the songs of two juveniles tutored using this paradigm.

(C) Boxplots showing the similarity to tutor song for juveniles tutored using only audio playbacks (subset of birds from Kalra et al. (Kalra et al., 2021)) and audio-visual playbacks. Circles represent data from individual birds.

(D) A view of the 1D blendspace in Unreal Engine 4 with the axis extremes representing “An idle animation” and “Tail quivering animation”. Different positions along the axis represent different speeds of the tail quivering.

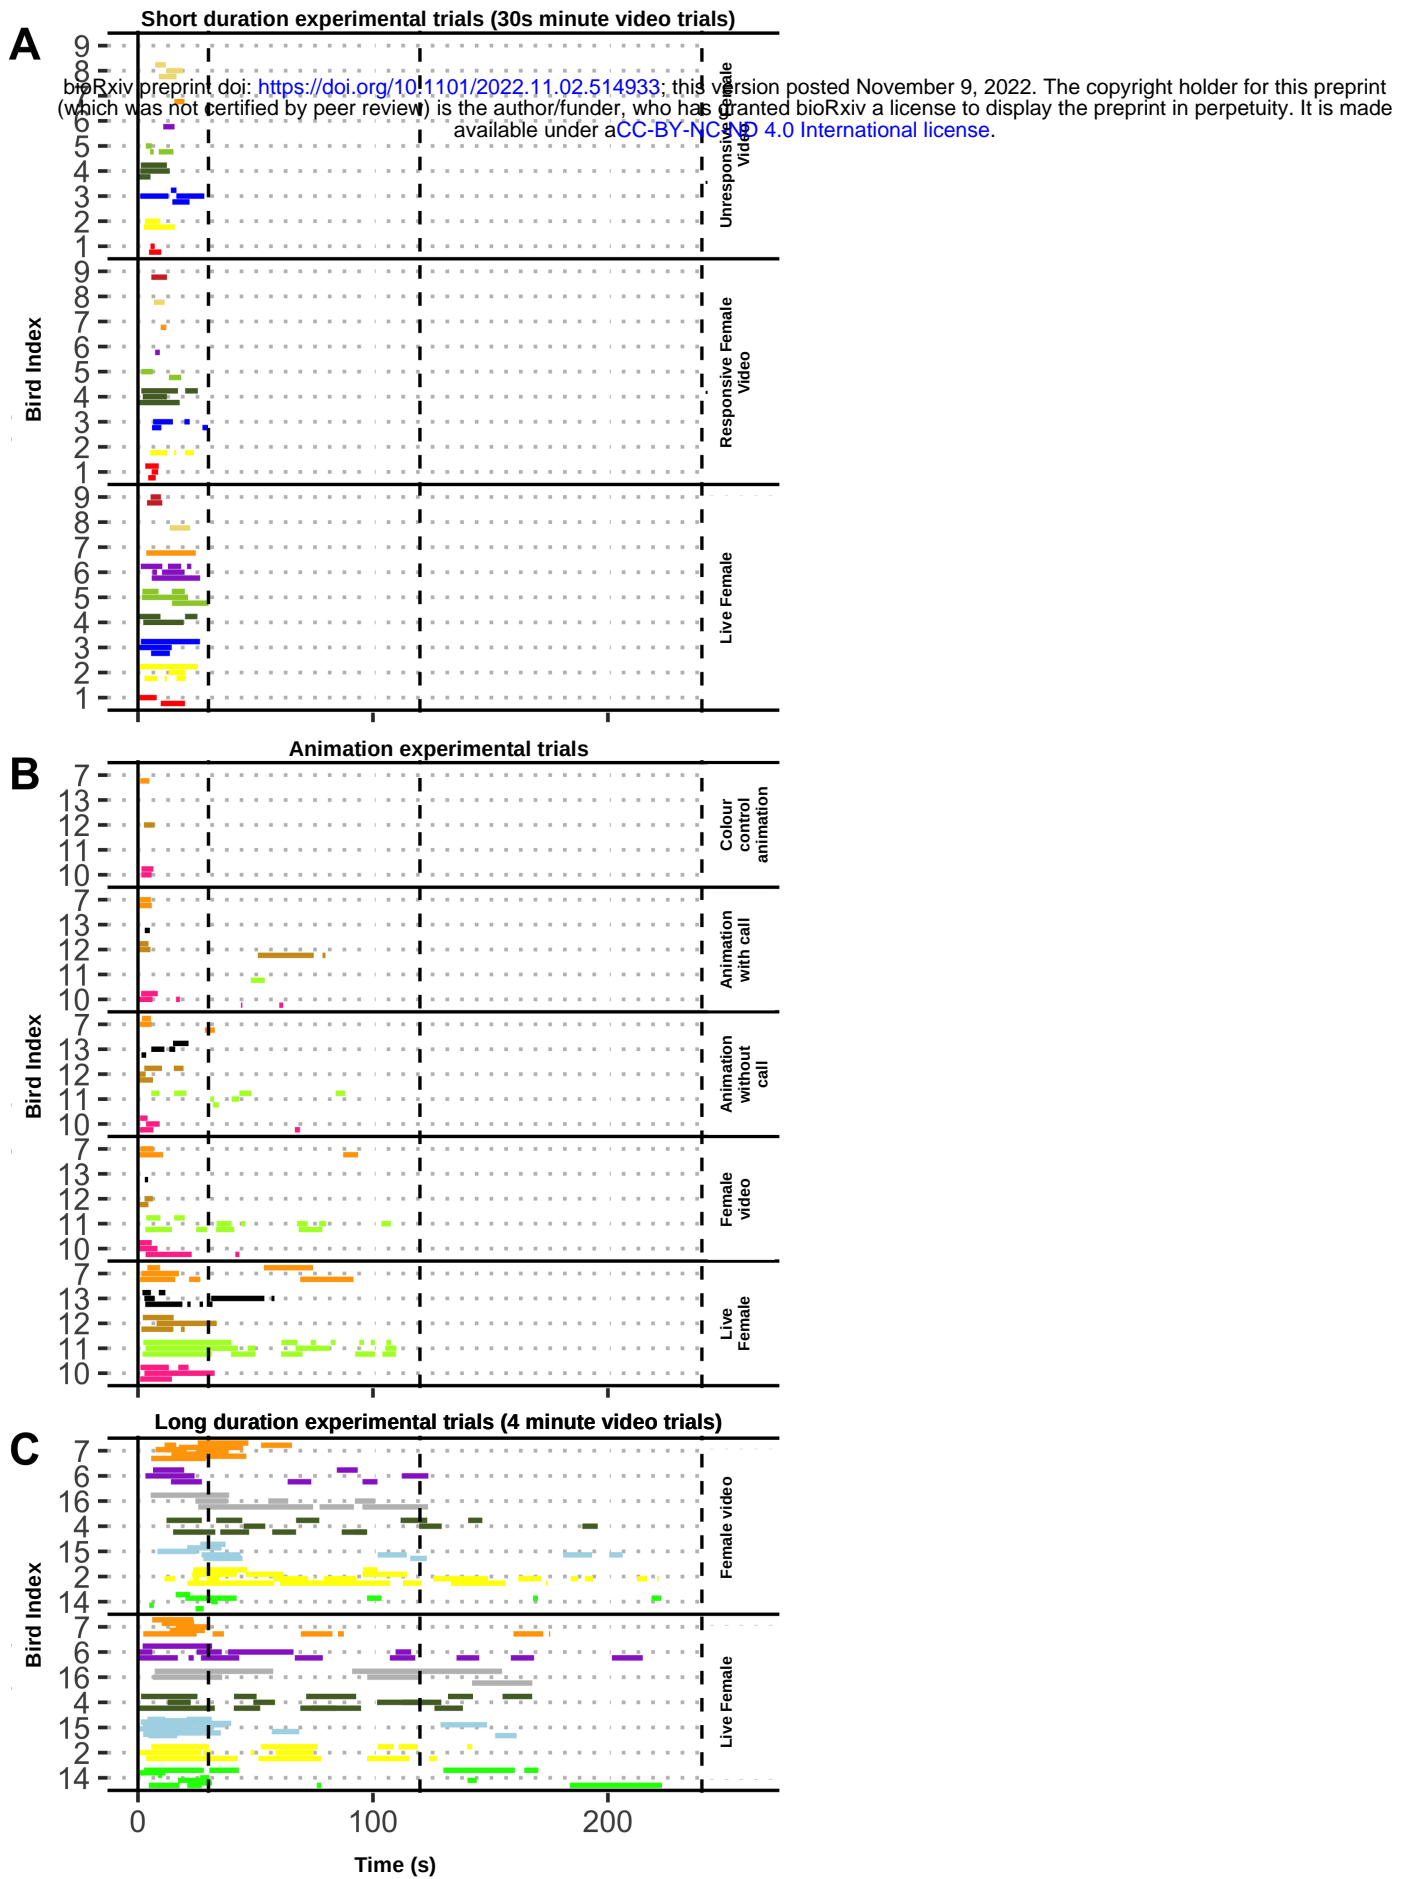

**FIGURE S1 Raster plots showing song bouts produced by all birds during short-duration, long-duration and animation experimental trials**



**FIGURE S1 Raster plots showing song bouts produced by all birds during short-duration, long-duration and animation experimental trials**

(A), (B), (C) Raster plots showing song bouts produced by all birds during short-duration (A), animation (B) and long-duration experimental trials (C). Each bar represents a song bout and the length of the bar represents the duration of the song bout. Different colours represent different birds. Bird indices are indices given to unique birds. Birds that were common across different experimental trials can be tracked using this bird index (for eg. bird #7 was used for all types of experimental trials).

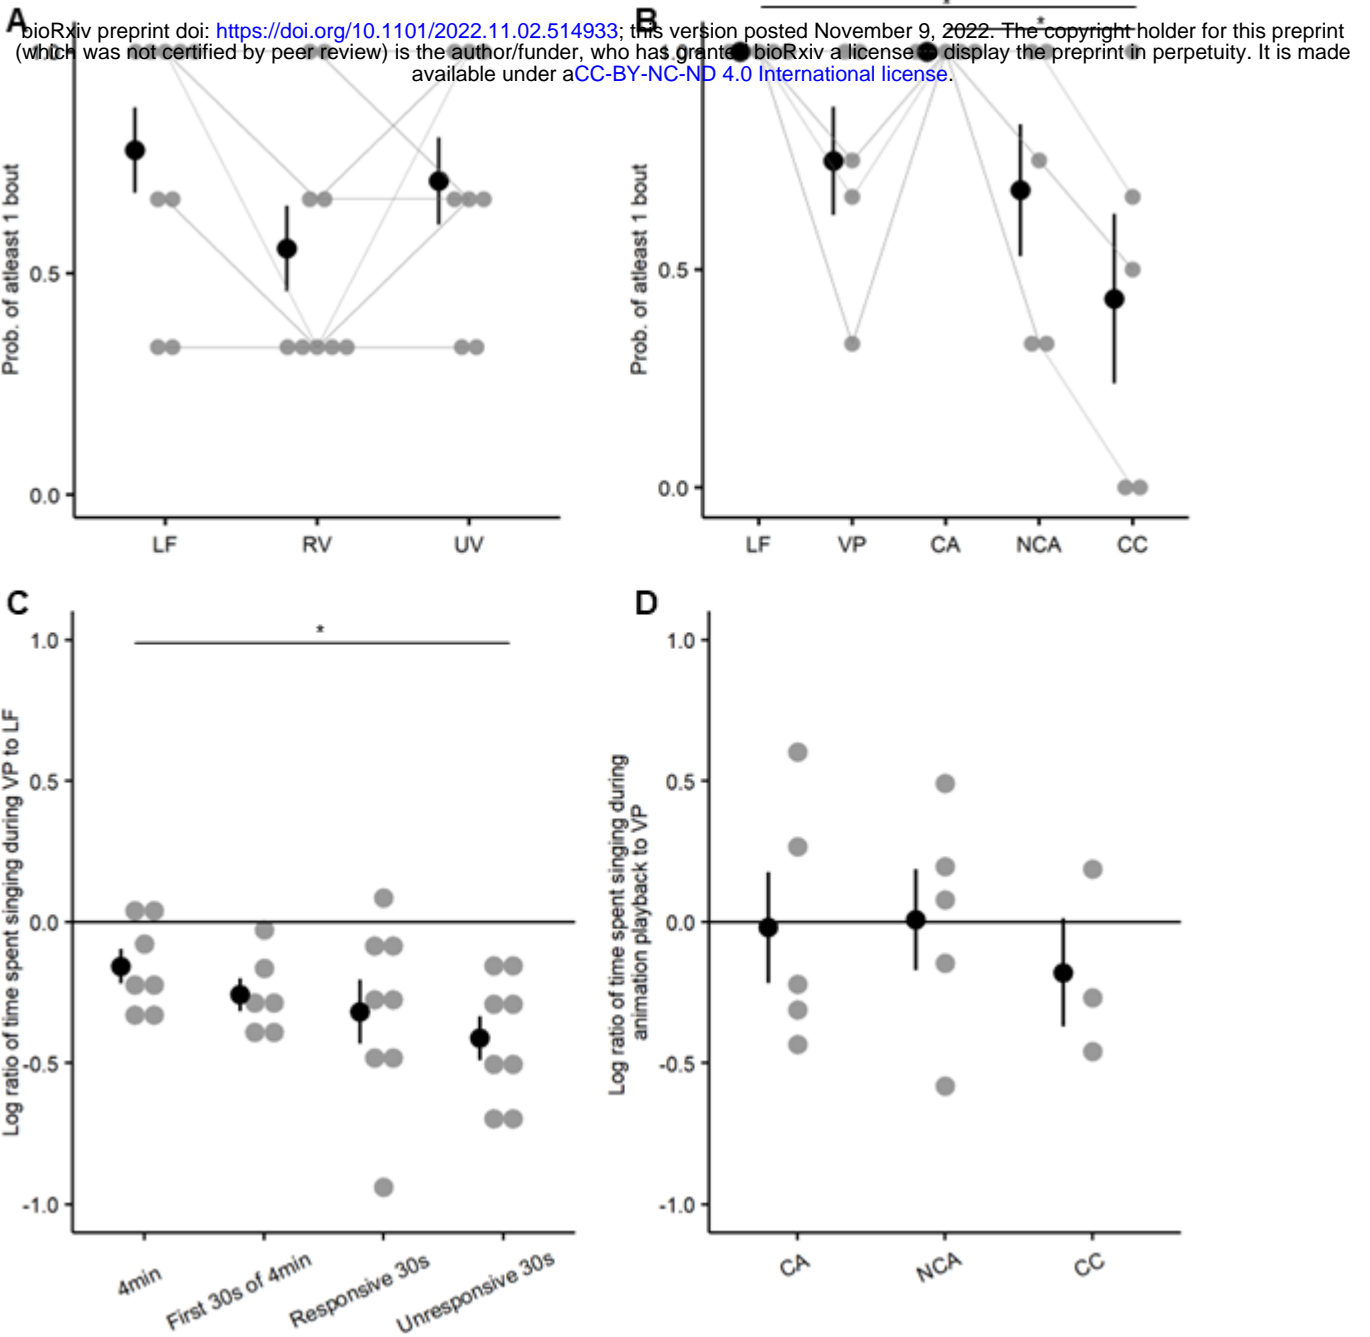

**Figure S2 Probability and amount of song produced towards different stimulus types**

(A), (B) Probability of singing atleast 1 bout of song for 30s video trials (A) and animation trials (B).

(C) Log ratio of time spent singing to video presentations relative to live females.

(D) Log ratio of time spent singing to animation relative to video presentation.

Grey circles represent data from individual birds and grey lines connect data from the same bird. Black circles and whiskers represent mean and s.e.m across all birds.

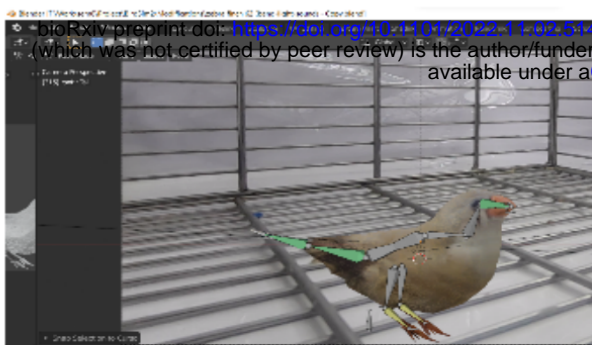

1) Animations are made in Blender and exported to work with Unreal Engine 4.

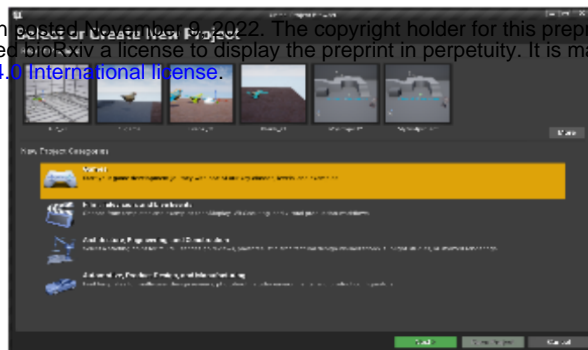

2) The animations are imported into Unreal Engine 4.

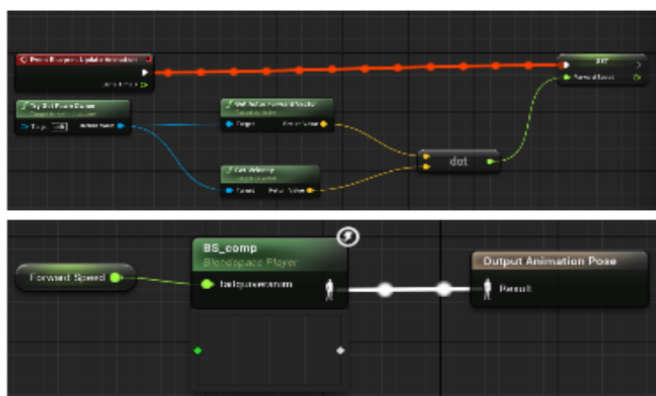

4) Make animation blueprint to convert the movements that are given via the keyboard key presses into forward speed and blend the animation from idle state to tail quivering state. The weight of the key press determines the magnitude of blending (a heavy key press transitions completely to the tail quivering animation and conversely for a light key press the transition is incomplete and the animated bird undertakes an intermediate state between idle and tail quiver).

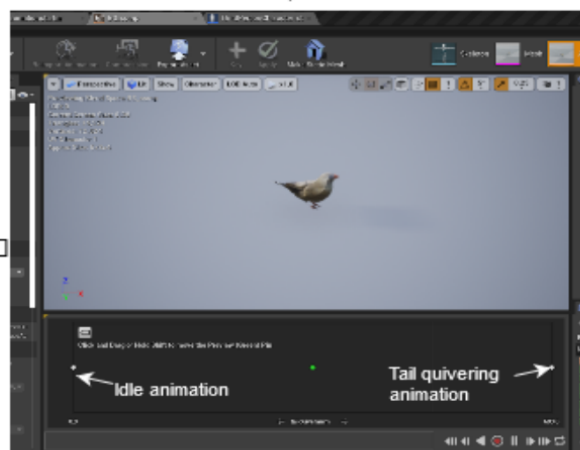

3) Create 1D blendspace in the game engine. A blendspace is simply a 1D axis that blends (merges) two animations into a continuous single animation. Here, on the extreme left of the axis is the idle animation whereas on the right is the tail quivering animation.

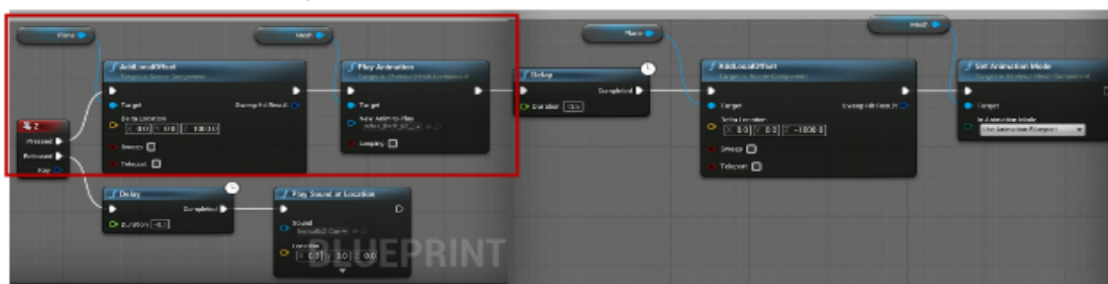

5) Finally, the controls for the animated model in the game engine are added with character blueprint class. The character blueprint class specifies the keys, timing and sequence of the events. For example the red highlighted box shows two events: 1) AddLocalOffset event associated with an object called plane. It adds a 1000 points offset in the z direction of the plane. After the execution of the AddLocalOffset, the execution of Play Animation event starts and it is associated with the Zebra finch model imported from blender. The whole blueprint shows how the "Z" key press translates into the execution of animation and playback of sound when pressed and released respectively.

### **Figure S3 Construction of interactive animations using video game engine Unreal Engine 4**

Flowchart depicting the process used to create interactive animations using the video game engine Unreal Engine 4.
